# Supplementary material for: Dual fluorescence of 2-(2′-hydroxyphenyl) benzoxazole derivatives via the branched decays from the upper excited-state
Source: Royal Society of Chemistry journal article supplement (doi:10.1039/d1cp03546k), 2021-01-01
Supplement: d1cp03546k1.pdf [file d1cp03546k1.pdf]

**Supplementary information**

**Dual fluorescence of 2-(2'-hydroxyphenyl) benzoxazole derivatives via the branched decays from upper excited-state**

Zhe Tang<sup>a</sup> Haiyun Han,<sup>b</sup> Junxia Ding,<sup>c</sup> and Panwang Zhou<sup>\*a</sup>

a Institute of Molecular Sciences and Engineering, Institute of Frontier and Interdisciplinary Science, Shandong University, Qingdao 266237, P.R. China

b Heze Dingtao People's Hospital, Heze, 274199, Shandong, P. R. China

c State Key Laboratory of Molecular Reaction Dynamics, Dalian Institute of Chemical Physics, Chinese Academy of Sciences, Dalian, 116023, Liaoning, P. R. China

E-mail: pwzhou@sdu.edu.cn Tel: +86-532-58632158

**Table S1.** Comparison of the calculated and the experimental vertical excitation and emission energies for 1H2NBO-enol and 1H2NBO-keto based on CAM-B3LYP/TZVP/IEFPCM levels.

|             |          | electronic transition          | energy (nm/eV) | $f^a$  | contrib <sup>b</sup> | CI <sup>c</sup> | exp. <sup>d</sup> nm/eV |
|-------------|----------|--------------------------------|----------------|--------|----------------------|-----------------|-------------------------|
| 1H2NBO-enol | VEEs     | S <sub>0</sub> →S <sub>1</sub> | 324/3.83       | 0.5649 | H→L                  | 0.91            | 350/3.54                |
|             |          | S <sub>0</sub> →S <sub>2</sub> | 282/4.40       | 0.0568 | H-1→L                | 0.39            |                         |
|             | emission | S <sub>1</sub> →S <sub>0</sub> | 363/3.41       | 0.5946 | L→H                  | 0.94            | -                       |
| 1H2NBO-keto | emission | S <sub>1</sub> →S <sub>0</sub> | 409/3.03       | 0.6081 | L→H                  | 0.96            | 470/2.64                |

**Table S2.** The primary bond lengths (Å), angles (°) and energy (Hartree) of the S<sub>0</sub>, S<sub>1</sub> and S<sub>2</sub> states for 2H3NBO-enol and 2H3NBO-keto.

|                                                    | 2H3NBO-enol    |                |                | 2H3NBO-keto    |                |
|----------------------------------------------------|----------------|----------------|----------------|----------------|----------------|
|                                                    | S <sub>0</sub> | S <sub>1</sub> | S <sub>2</sub> | S <sub>1</sub> | S <sub>2</sub> |
| O <sub>1</sub> -H <sub>2</sub>                     | 0.985          | 1.038          | 0.987          | 1.948          | 2.118          |
| H <sub>2</sub> -N <sub>3</sub>                     | 1.796          | 1.584          | 1.794          | 1.021          | 1.007          |
| δ(O <sub>1</sub> -H <sub>2</sub> -N <sub>3</sub> ) | 146.0          | 150.6          | 146.8          | 125.2          | 114.2          |
| energy                                             | -859.96890     | -859.85798     | -859.83947     | -859.87013     | -859.84180     |
| Dipole moments                                     | 3.001516       | 3.292004       | 2.689149       | 8.191112       | 7.843803       |

**Table S3.** Comparison of the calculated and the experimental vertical excitation and emission energies for 2H3NBO-enol and 2H3NBO-keto based on CAM-B3LYP/TZVP/IEFPCM levels.

|             |          | electronic transition          | energy (nm/eV) | $f$    | contrib | CI   | exp. (nm/eV) |
|-------------|----------|--------------------------------|----------------|--------|---------|------|--------------|
| 2H3NBO-enol | VEEs     | S <sub>0</sub> →S <sub>1</sub> | 334/3.71       | 0.1031 | H→L     | 0.84 | 330/3.76     |
|             |          | S <sub>0</sub> →S <sub>2</sub> | 301/4.12       | 0.8525 | H-1→L   | 0.82 |              |
|             | emission | S <sub>1</sub> →S <sub>0</sub> | 390/3.18       | 0.1044 | L→H     | 0.92 | 450/2.76     |
| 2H3NBO-keto | emission | S <sub>1</sub> →S <sub>0</sub> | 586/2.12       | 0.1365 | L→H     | 1.00 | 670/1.85     |

**Fig. S1** Gibbs free-energy profile for the reaction of 1H2NBO and 2H3NBO at the B3LYP-D3/TZVP/IEFPCM levels.

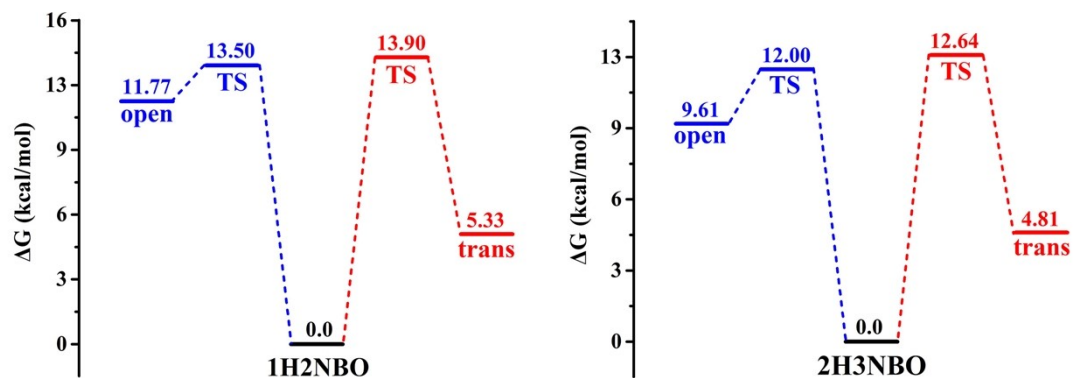

**Fig. S2** Orbitals involved in the active space of SA3-CASSCF(12,12)/6-31G(d) calculations.

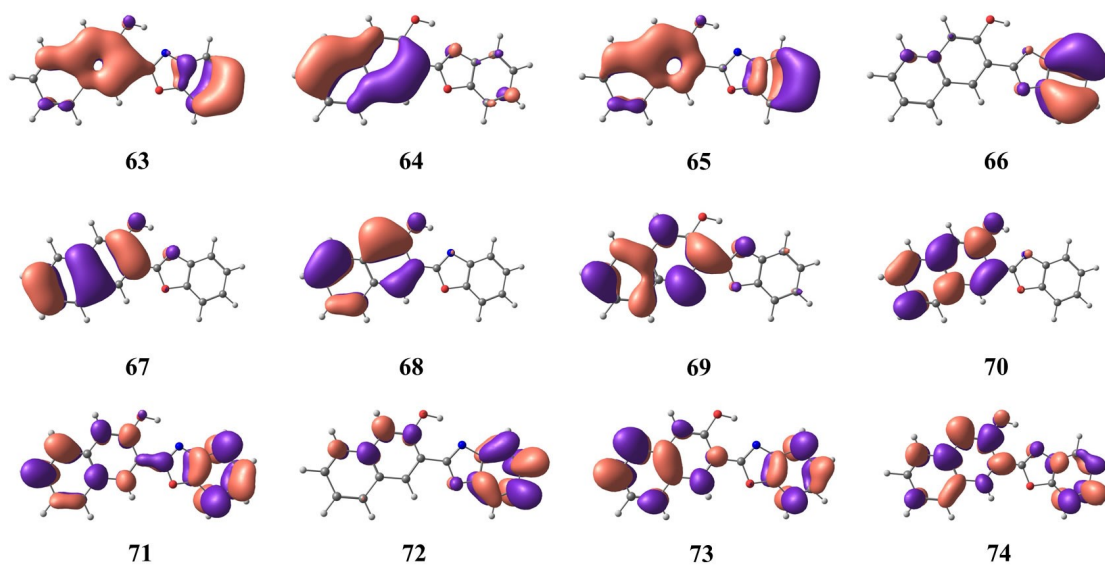

**Fig. S3** The calculated IR spectra of 1H2NBO-enol at the spectral region of O<sub>1</sub>-H<sub>2</sub> stretching band in the S<sub>0</sub> and S<sub>1</sub> states at the B3LYP-D3/TZVP/IEFPCM levels.

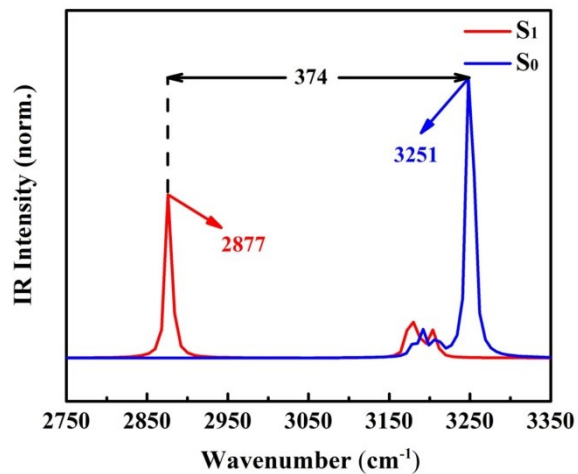

**Fig. S4** Calculated frontal MOs of 1H2NBO-enol based on CAM-B3LYP-D3/TZVP/IEFPCM levels.

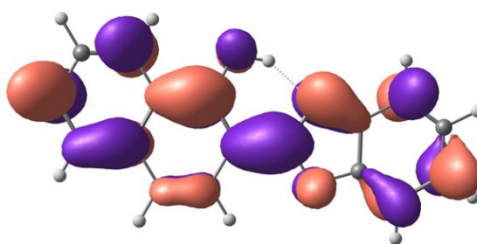

**LUMO**

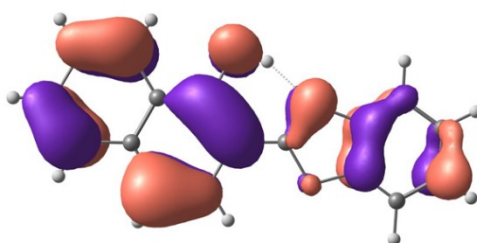

**HOMO**

**Fig. S5** The calculated IR spectra of 2H3NBO-enol at the spectral region of O<sub>1</sub>-H<sub>2</sub> stretching band in the S<sub>0</sub> and S<sub>1</sub> states at the B3LYP-D3/TZVP/IEFPCM levels.

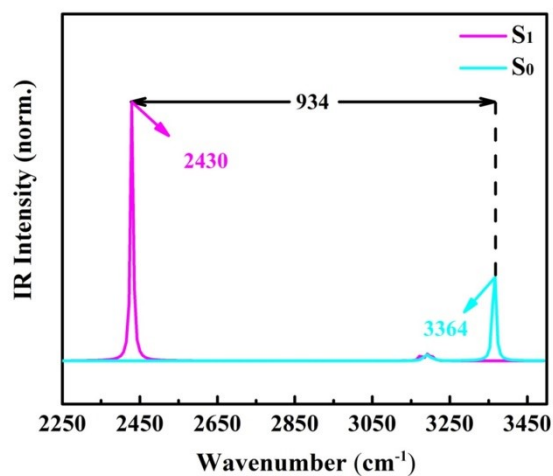

**Fig. S6** Natural transition orbitals of 1H2NBO and 2H3NBO in S<sub>0</sub>→S<sub>1</sub> and S<sub>0</sub>→S<sub>2</sub> based on CAM-B3LYP-D3/TZVP/IEFPCM levels.

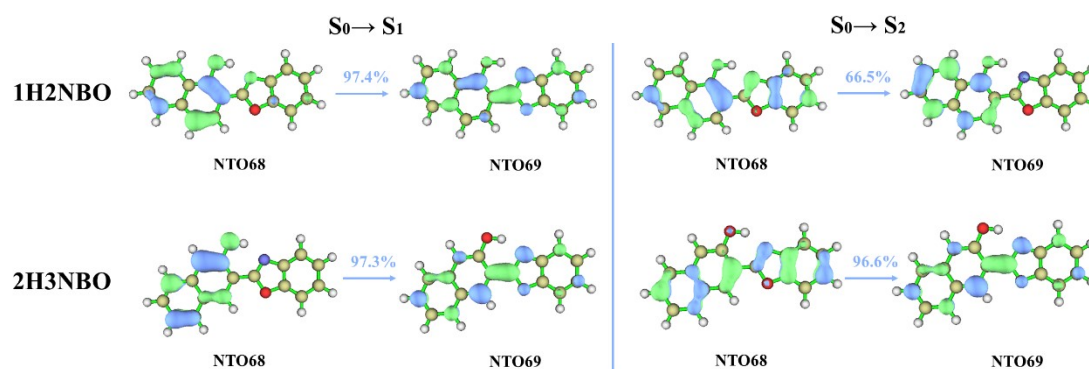

**Fig. S7** Calculated frontal MOs of 2H3NBO-enol based on CAM-B3LYP-D3/TZVP/IEFPCM levels.

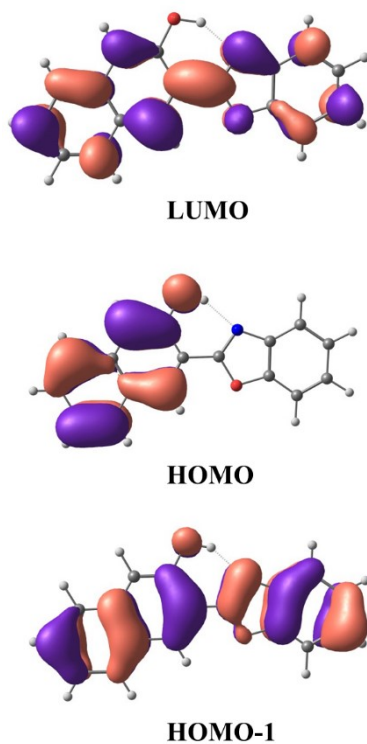

**Fig. S8** The charge density difference ( $S_1-S_0$ ) maps of 1H2NBO and 2H3NBO based on CAM-B3LYP-D3/TZVP/IEFPCM levels (Blue is negative, purple is positive).

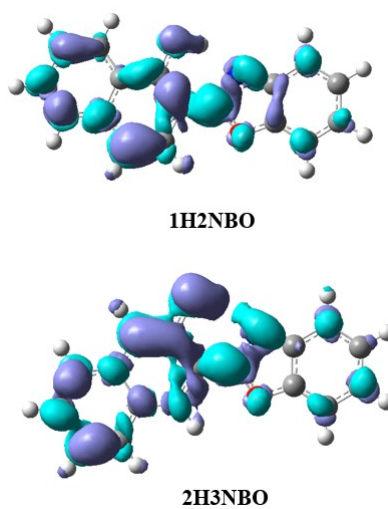

**Figure S9.** The CASSCF(12,12)/6-31G\* computed energy profiles along the TD-B3LYP/TZVP determined PECs of the ESIPT process of 1H2NBO (left) and 2H3NBO (right).

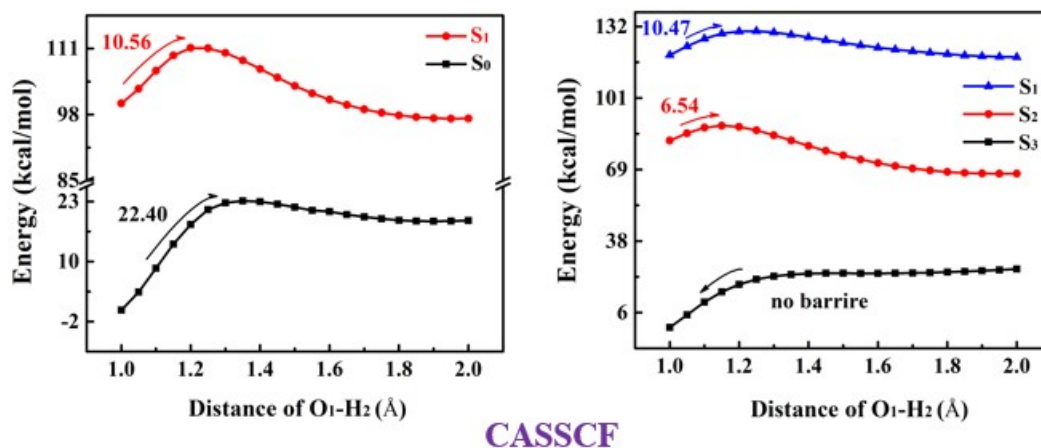

$S_0$  geometry of 1H2NBO-enol in n-hexane solvent, b3lyp-d3/tzvp/iefpcm, empiricaldispersion=gd3bj

Energy= -859.972284

|   |             |             |             |
|---|-------------|-------------|-------------|
| C | 2.97296800  | -0.69186600 | -0.00005200 |
| C | 3.13590600  | 0.69617200  | 0.00012400  |
| C | 4.36362600  | 1.32598700  | 0.00010700  |
| C | 5.47506000  | 0.48372900  | -0.00010500 |
| C | 5.33811000  | -0.91195300 | -0.00029200 |
| C | 4.08859900  | -1.52390900 | -0.00027100 |
| C | 1.01822900  | 0.20041200  | 0.00027500  |
| H | 4.45511600  | 2.40338000  | 0.00025100  |
| H | 6.46609600  | 0.91891400  | -0.00013100 |
| H | 6.22911700  | -1.52684000 | -0.00046100 |
| H | 3.98094400  | -2.60026900 | -0.00042000 |
| C | -0.40144600 | 0.44057700  | 0.00011200  |
| C | -1.27601100 | -0.65204900 | 0.00015900  |
| C | -0.92381700 | 1.76406700  | -0.00004600 |
| C | -2.68699700 | -0.43519000 | 0.00005100  |
| C | -2.26752100 | 1.99050000  | -0.00014800 |
| H | -0.22695100 | 2.59121000  | -0.00006900 |
| C | -3.18297500 | 0.90145700  | -0.00010800 |
| C | -3.59821000 | -1.51718300 | 0.00009200  |
| H | -2.65351700 | 3.00222800  | -0.00025500 |
| C | -4.58339000 | 1.10048400  | -0.00020500 |
| C | -4.95266200 | -1.28684700 | -0.00001600 |
| H | -3.20926300 | -2.52592200 | 0.00021000  |

|   |             |             |             |
|---|-------------|-------------|-------------|
| C | -5.44880200 | 0.03302200  | -0.00016300 |
| H | -4.96489500 | 2.11485600  | -0.00032000 |
| H | -5.64380900 | -2.12043300 | 0.00001900  |
| H | -6.51849900 | 0.20353000  | -0.00024300 |
| N | 1.60951400  | -0.96522200 | 0.00000600  |
| O | 1.88220800  | 1.26530900  | 0.00031200  |
| O | -0.85041700 | -1.92477800 | 0.00022000  |
| H | 0.14073500  | -1.93279900 | 0.00003600  |

S<sub>0</sub> geometry of 1H2NBO-keto in n-hexane solvent, b3lyp-d3/tzvp/iefpcm,

empiricaldispersion=gd3bj

Energy=-859.961408

|   |             |             |             |
|---|-------------|-------------|-------------|
| C | -2.97845600 | -0.69692600 | 0.00009000  |
| C | -3.13620200 | 0.68794500  | -0.00005100 |
| C | -4.36417400 | 1.30847600  | -0.00013600 |
| C | -5.47677500 | 0.46244500  | -0.00007100 |
| C | -5.33458700 | -0.92786500 | 0.00007400  |
| C | -4.07981100 | -1.53823000 | 0.00016100  |
| C | -0.96914300 | 0.27484300  | 0.00001300  |
| H | -4.45624800 | 2.38548300  | -0.00024000 |
| H | -6.46803600 | 0.89604200  | -0.00012800 |
| H | -6.22051500 | -1.54945500 | 0.00012500  |
| H | -3.97078700 | -2.61400200 | 0.00027800  |
| C | 0.40633500  | 0.47828400  | -0.00000800 |
| C | 1.25584000  | -0.69927300 | -0.00012400 |
| C | 0.96234700  | 1.79882200  | 0.00006100  |
| C | 2.70300600  | -0.44814100 | -0.00004400 |
| C | 2.30211000  | 1.99492000  | 0.00007800  |
| H | 0.28448700  | 2.64326000  | 0.00011600  |
| C | 3.20758300  | 0.87776100  | 0.00005000  |
| C | 3.59404400  | -1.53274500 | -0.00009100 |
| H | 2.71194300  | 2.99732100  | 0.00013800  |
| C | 4.60457700  | 1.06336500  | 0.00008400  |
| C | 4.95923500  | -1.32506400 | -0.00005000 |
| H | 3.18005600  | -2.53247900 | -0.00016800 |
| C | 5.46477300  | -0.01643700 | 0.00003800  |
| H | 4.99894300  | 2.07314100  | 0.00014800  |
| H | 5.63890800  | -2.16819000 | -0.00008900 |
| H | 6.53579900  | 0.14767500  | 0.00006900  |
| N | -1.60726300 | -0.91138400 | 0.00014600  |
| O | -1.88234300 | 1.28007400  | -0.00006900 |
| O | 0.79548200  | -1.87014900 | -0.00018100 |
| H | -1.01302600 | -1.75159500 | 0.00027700  |



S<sub>0</sub> geometry of 2H3NBO-enol in n-hexane solvent, b3lyp-d3/tzvp/iefpcm,  
empiricaldispersion=gd3bj

Energy=-859.968897

|   |             |             |             |
|---|-------------|-------------|-------------|
| C | -3.11083100 | 0.51177400  | 0.00004500  |
| C | -2.91642000 | -0.87191900 | -0.00004600 |
| C | -3.94492300 | -1.79233800 | -0.00007700 |
| C | -5.23243100 | -1.25783000 | -0.00000700 |
| C | -5.45383100 | 0.12750600  | 0.00008400  |
| C | -4.40041800 | 1.03555400  | 0.00010900  |
| C | -0.99596000 | 0.14639100  | -0.00000900 |
| H | -3.76146500 | -2.85786800 | -0.00015100 |
| H | -6.08136100 | -1.92930200 | -0.00002700 |
| H | -6.47162300 | 0.49622800  | 0.00013200  |
| H | -4.56791300 | 2.10419200  | 0.00017400  |
| C | 0.44430100  | 0.27297800  | -0.00001100 |
| C | 1.25886200  | -0.84561700 | 0.00001200  |
| C | 1.03598400  | 1.58245000  | -0.00003400 |
| C | 2.66053900  | -0.73754700 | 0.00001700  |
| C | 2.40677200  | 1.70256300  | -0.00002700 |
| C | 3.24590600  | 0.56959600  | -0.00000200 |
| C | 3.50655900  | -1.87794500 | 0.00004300  |
| H | 2.83569000  | 2.69670300  | -0.00004500 |
| C | 4.66151300  | 0.67566700  | 0.00000400  |
| C | 4.86932900  | -1.73829000 | 0.00004800  |
| H | 3.05397700  | -2.86295600 | 0.00005800  |
| C | 5.44917000  | -0.44667900 | 0.00002800  |
| H | 5.11145500  | 1.66152400  | -0.00001200 |
| H | 5.50819800  | -2.61247100 | 0.00006800  |
| H | 6.52795800  | -0.34828200 | 0.00003200  |
| N | -1.86082300 | 1.12176900  | 0.00003100  |
| O | -1.56009000 | -1.10357900 | -0.00010900 |
| H | 0.80455600  | -1.82830500 | 0.00003000  |
| O | 0.28854400  | 2.70698600  | -0.00006900 |
| H | -0.66607500 | 2.46300400  | -0.00010300 |

S<sub>0</sub> geometry of trans-1H2NBO-enol in n-hexane solvent, b3lyp-d3/tzvp/iefpcm,  
empiricaldispersion=gd3bj

Energy=-859.962933

|   |            |             |            |
|---|------------|-------------|------------|
| C | 3.15204500 | 0.76536300  | 0.00058000 |
| C | 2.97408700 | -0.62002000 | 0.00054300 |
| C | 4.00572400 | -1.53553400 | 0.00071200 |

|   |             |             |             |
|---|-------------|-------------|-------------|
| C | 5.29064000  | -0.99289500 | 0.00092200  |
| C | 5.50104800  | 0.39375000  | 0.00096600  |
| C | 4.44070000  | 1.29407700  | 0.00079900  |
| C | 1.04127500  | 0.41987600  | 0.00015700  |
| H | 3.83023200  | -2.60258800 | 0.00067900  |
| H | 6.14385400  | -1.65890500 | 0.00106200  |
| H | 6.51620800  | 0.76997800  | 0.00114700  |
| H | 4.60019400  | 2.36398100  | 0.00085300  |
| C | -0.40567600 | 0.51059300  | -0.00014500 |
| C | -1.24918400 | -0.60006200 | -0.00018500 |
| C | -0.97825500 | 1.81738100  | -0.00035300 |
| C | -2.66745500 | -0.42736200 | -0.00044800 |
| C | -2.32601300 | 2.00499400  | -0.00060200 |
| H | -0.30058600 | 2.65993700  | -0.00030900 |
| C | -3.20866900 | 0.89058300  | -0.00065400 |
| C | -3.54555700 | -1.53743900 | -0.00050700 |
| H | -2.73971300 | 3.00576500  | -0.00076400 |
| C | -4.61416200 | 1.04638200  | -0.00090800 |
| C | -4.90668000 | -1.34985800 | -0.00075600 |
| H | -3.12870100 | -2.53458000 | -0.00035500 |
| C | -5.44585200 | -0.04733800 | -0.00095700 |
| H | -5.02608900 | 2.04875600  | -0.00106300 |
| H | -5.57018700 | -2.20564000 | -0.00080000 |
| H | -6.52043600 | 0.08863400  | -0.00115300 |
| N | 1.90606100  | 1.38297400  | 0.00043400  |
| O | 1.61659500  | -0.85149300 | 0.00031600  |
| O | -0.82190300 | -1.88503800 | 0.00000500  |
| H | 0.14715100  | -1.91885700 | 0.00010800  |

S<sub>0</sub> geometry of trans-2H3NBO-enol in n-hexane solvent, b3lyp-d3/tzvp/iefpcm,

empiricaldispersion=gd3bj

Energy=-859.959818

|   |            |             |             |
|---|------------|-------------|-------------|
| C | 2.93827500 | -0.94368300 | -0.00001200 |
| C | 3.10912800 | 0.44251400  | 0.00002400  |
| C | 4.33579700 | 1.07392700  | 0.00006700  |
| C | 5.44514500 | 0.22927200  | 0.00007900  |
| C | 5.30520700 | -1.16673500 | 0.00004300  |
| C | 4.05525300 | -1.77614900 | -0.00000400 |
| C | 0.98121000 | -0.08397700 | 0.00001200  |
| H | 4.43045000 | 2.15110300  | 0.00009200  |
| H | 6.43704000 | 0.66246600  | 0.00011000  |
| H | 6.19555600 | -1.78261000 | 0.00004300  |
| H | 3.94440400 | -2.85214400 | -0.00004300 |

|   |             |             |             |
|---|-------------|-------------|-------------|
| C | -0.44806500 | 0.19042000  | 0.00001400  |
| C | -1.31117700 | -0.89429200 | -0.00002200 |
| C | -1.00022500 | 1.51380100  | 0.00003500  |
| C | -2.70686800 | -0.74038500 | -0.00003300 |
| C | -2.36570600 | 1.68194500  | 0.00002300  |
| C | -3.24821500 | 0.58400800  | -0.00000900 |
| C | -3.59066400 | -1.85227200 | -0.00006700 |
| H | -2.75560700 | 2.69205200  | 0.00004100  |
| C | -4.65872500 | 0.74076900  | -0.00002100 |
| C | -4.94760000 | -1.66516200 | -0.00007700 |
| H | -3.17138600 | -2.85175200 | -0.00008500 |
| C | -5.48370200 | -0.35445000 | -0.00005400 |
| H | -5.07432100 | 1.74157000  | -0.00000300 |
| H | -5.61623300 | -2.51681300 | -0.00010400 |
| H | -6.55857900 | -0.22000000 | -0.00006200 |
| N | 1.57793200  | -1.23152800 | -0.00008600 |
| O | 1.85170100  | 1.00261600  | 0.00000300  |
| H | -0.88499300 | -1.88936600 | -0.00004300 |
| O | -0.24473600 | 2.64526300  | 0.00006800  |
| H | 0.69800900  | 2.42585000  | 0.00009200  |

S<sub>0</sub> geometry of open-1H<sub>2</sub>NBO-enol in n-hexane solvent, b3lyp-d3/tzvp/iefpcm,  
empiricaldispersion=gd3bj

Energy=-859.951306

|   |             |             |             |
|---|-------------|-------------|-------------|
| C | 3.04894800  | -0.70167700 | -0.11066000 |
| C | 3.13011300  | 0.67882300  | 0.09209500  |
| C | 4.32022700  | 1.37030500  | 0.21258400  |
| C | 5.47877400  | 0.60060400  | 0.12018300  |
| C | 5.42526100  | -0.78715400 | -0.08270800 |
| C | 4.21415400  | -1.46027800 | -0.20102300 |
| C | 1.04812000  | 0.03936100  | -0.03700200 |
| H | 4.34954300  | 2.44001000  | 0.36902600  |
| H | 6.44260300  | 1.08596700  | 0.20716000  |
| H | 6.35158100  | -1.34397200 | -0.14801600 |
| H | 4.16793300  | -2.52979300 | -0.35749500 |
| C | -0.38499200 | 0.29358600  | -0.04432200 |
| C | -1.32512400 | -0.72970600 | 0.04628700  |
| C | -0.84143200 | 1.63910300  | -0.12927800 |
| C | -2.72515900 | -0.43417200 | 0.02609900  |
| C | -2.16880100 | 1.95075800  | -0.13016000 |
| H | -0.10283400 | 2.42488600  | -0.19338000 |
| C | -3.14599100 | 0.92764100  | -0.05290600 |
| C | -3.71740800 | -1.44564300 | 0.07878100  |

|   |             |             |             |
|---|-------------|-------------|-------------|
| H | -2.48909700 | 2.98316700  | -0.19373100 |
| C | -4.53148100 | 1.21702400  | -0.05751800 |
| C | -5.05392400 | -1.13159700 | 0.07189400  |
| H | -3.44458400 | -2.49482100 | 0.11124900  |
| C | -5.46660200 | 0.21474400  | 0.00627300  |
| H | -4.84265200 | 2.25343900  | -0.11503800 |
| H | -5.79388600 | -1.92085700 | 0.11053200  |
| H | -6.52285500 | 0.45307500  | 0.00145600  |
| N | 1.70955400  | -1.06474100 | -0.18786700 |
| O | 1.85152800  | 1.16220600  | 0.14100700  |
| O | -0.88719600 | -2.00565600 | 0.15249900  |
| H | -1.62538700 | -2.60063600 | 0.32355200  |

S<sub>0</sub> geometry of open-2H3NBO-enol in n-hexane solvent, b3lyp-d3/tzvp/iefpcm,  
empiricaldispersion=gd3bj

Energy=-859.952525

|   |             |             |             |
|---|-------------|-------------|-------------|
| C | -3.13930500 | 0.50590200  | 0.17451200  |
| C | -2.89171300 | -0.83193700 | -0.14514300 |
| C | -3.88331700 | -1.78060500 | -0.30598300 |
| C | -5.18880200 | -1.32592000 | -0.12781900 |
| C | -5.46470600 | 0.01225300  | 0.19374000  |
| C | -4.44859700 | 0.94857600  | 0.34947600  |
| C | -1.02458300 | 0.28321800  | 0.00240500  |
| H | -3.65963300 | -2.80903600 | -0.55462800 |
| H | -6.00960500 | -2.02282000 | -0.24057800 |
| H | -6.49499000 | 0.31925100  | 0.32234900  |
| H | -4.65578600 | 1.98117100  | 0.59689100  |
| C | 0.42963100  | 0.38837700  | -0.01726400 |
| C | 1.19180400  | -0.76286100 | 0.06253500  |
| C | 1.10369700  | 1.64731900  | -0.11729700 |
| C | 2.60053300  | -0.73952800 | 0.06205900  |
| C | 2.47820100  | 1.69329600  | -0.11920400 |
| C | 3.26227800  | 0.52218200  | -0.02973200 |
| C | 3.37612100  | -1.92363500 | 0.15183400  |
| H | 2.97643800  | 2.65425400  | -0.19841000 |
| C | 4.67937100  | 0.54976000  | -0.02829600 |
| C | 4.74614800  | -1.86426200 | 0.15085900  |
| H | 2.86655600  | -2.87774700 | 0.22174200  |
| C | 5.40108000  | -0.61434200 | 0.05959400  |
| H | 5.18666300  | 1.50503600  | -0.09777600 |
| H | 5.33178500  | -2.77231900 | 0.21999800  |
| H | 6.48370900  | -0.57913500 | 0.05974100  |
| N | -1.92453100 | 1.17743800  | 0.25801300  |

|   |             |             |             |
|---|-------------|-------------|-------------|
| O | -1.53655200 | -0.98278200 | -0.25914400 |
| H | 0.68904900  | -1.71784400 | 0.13531400  |
| O | 0.34530600  | 2.76907500  | -0.22420600 |
| H | 0.92045600  | 3.54002300  | -0.30158300 |

S<sub>1</sub> geometry of 1H2NBO-enol in n-hexane solvent, b3lyp-d3/tzvp/iefpcm,  
empiricaldispersion=gd3bj

Energy= -859.850941

|   |             |             |             |
|---|-------------|-------------|-------------|
| C | -2.95808900 | -0.69209100 | -0.00000200 |
| C | -3.15636300 | 0.70671800  | 0.00000300  |
| C | -4.39480700 | 1.30567200  | 0.00002900  |
| C | -5.49856600 | 0.43858400  | 0.00005700  |
| C | -5.33114500 | -0.95302700 | 0.00005300  |
| C | -4.07185400 | -1.54478200 | 0.00002200  |
| C | -1.01840600 | 0.25890600  | -0.00006100 |
| H | -4.50784700 | 2.38113200  | 0.00002900  |
| H | -6.49754900 | 0.85501900  | 0.00008000  |
| H | -6.21064300 | -1.58523400 | 0.00007400  |
| H | -3.94664200 | -2.61916500 | 0.00001700  |
| C | 0.37320400  | 0.49154700  | -0.00001800 |
| C | 1.28843000  | -0.64099800 | -0.00001900 |
| C | 0.93397400  | 1.77775300  | -0.00001900 |
| C | 2.68546900  | -0.44777100 | -0.00001000 |
| C | 2.30613700  | 1.97653900  | -0.00000800 |
| H | 0.26931600  | 2.63141800  | -0.00002500 |
| C | 3.21850200  | 0.88901400  | -0.00000500 |
| C | 3.59587800  | -1.53271800 | 0.00000600  |
| H | 2.69538000  | 2.98742600  | -0.00000500 |
| C | 4.60582100  | 1.07868400  | 0.00001100  |
| C | 4.96652300  | -1.30676100 | 0.00002100  |
| H | 3.20982300  | -2.54280500 | 0.00000700  |
| C | 5.48541400  | -0.00702500 | 0.00002300  |
| H | 4.99419100  | 2.09060100  | 0.00001500  |
| H | 5.64105600  | -2.15426000 | 0.00003200  |
| H | 6.55460900  | 0.15668800  | 0.00003500  |
| N | -1.61541100 | -0.94023100 | -0.00004100 |
| O | -1.92268500 | 1.31219400  | -0.00003400 |
| O | 0.81303800  | -1.88235700 | -0.00002200 |
| H | -0.19738500 | -1.84736100 | -0.00002400 |

S<sub>1</sub> geometry of 1H2NBO-keto in n-hexane solvent, b3lyp-d3/tzvp/iefpcm,  
empiricaldispersion=gd3bj

Energy=-859.853939

|   |             |             |             |
|---|-------------|-------------|-------------|
| C | -3.01524100 | -0.69960200 | 0.00564600  |
| C | -3.15867400 | 0.69475500  | -0.00148000 |
| C | -4.37909500 | 1.33016400  | -0.02258700 |
| C | -5.50854400 | 0.49030200  | -0.04057200 |
| C | -5.38114500 | -0.89898600 | -0.03458700 |
| C | -4.13510400 | -1.53277900 | -0.01072100 |
| C | -0.99329000 | 0.25132800  | 0.05027200  |
| H | -4.45858600 | 2.40786700  | -0.02649600 |
| H | -6.49472200 | 0.93505800  | -0.05831000 |
| H | -6.27592100 | -1.50862100 | -0.04842300 |
| H | -4.04156500 | -2.60957100 | -0.00554400 |
| C | 0.41204200  | 0.45541500  | 0.02317300  |
| C | 1.29552600  | -0.71370500 | 0.01878900  |
| C | 0.95272700  | 1.73811400  | 0.02044900  |
| C | 2.72264500  | -0.45724200 | 0.00471200  |
| C | 2.33981900  | 1.96230000  | 0.00431100  |
| H | 0.28512200  | 2.59094900  | 0.03176500  |
| C | 3.24135600  | 0.88899400  | -0.00436600 |
| C | 3.63454600  | -1.52478400 | -0.01061600 |
| H | 2.71198100  | 2.97911600  | 0.00021000  |
| C | 4.64474600  | 1.08762000  | -0.02201200 |
| C | 5.00016200  | -1.29619200 | -0.02842800 |
| H | 3.24223800  | -2.53323300 | -0.00701400 |
| C | 5.51406500  | 0.01840700  | -0.03386500 |
| H | 5.02463200  | 2.10305600  | -0.02751200 |
| H | 5.68322900  | -2.13690300 | -0.03799100 |
| H | 6.58378200  | 0.18247600  | -0.04769300 |
| N | -1.65988900 | -0.92678800 | 0.03638100  |
| O | -1.90287300 | 1.27141000  | 0.02409900  |
| O | 0.82042800  | -1.88430800 | 0.02913600  |
| H | -1.10065000 | -1.78414400 | 0.03775700  |

S<sub>1</sub> geometry of 2H3NBO-enol in n-hexane solvent, b3lyp-d3/tzvp/iefpcm,  
empiricaldispersion=gd3bj

Energy=-859.857979

|   |             |             |             |
|---|-------------|-------------|-------------|
| C | -3.10502800 | 0.52497700  | -0.00068200 |
| C | -2.97033900 | -0.87746700 | -0.00107000 |
| C | -4.03318000 | -1.74988500 | 0.00009800  |
| C | -5.31179500 | -1.17031300 | 0.00204500  |
| C | -5.47369200 | 0.21825800  | 0.00250900  |
| C | -4.38454900 | 1.08910400  | 0.00108700  |
| C | -0.99198600 | 0.05005900  | -0.00427800 |

|   |             |             |             |
|---|-------------|-------------|-------------|
| H | -3.88820000 | -2.82168300 | -0.00037200 |
| H | -6.18366500 | -1.81138100 | 0.00313500  |
| H | -6.47564000 | 0.62994800  | 0.00397700  |
| H | -4.51732400 | 2.16270200  | 0.00134300  |
| C | 0.41514700  | 0.15563400  | -0.00272100 |
| C | 1.30405600  | -0.91226400 | 0.00311900  |
| C | 0.99349800  | 1.48953600  | 0.00065900  |
| C | 2.72196100  | -0.73794500 | -0.00137400 |
| C | 2.38251700  | 1.67969800  | -0.00288100 |
| C | 3.27544400  | 0.58732700  | 0.00275700  |
| C | 3.60624900  | -1.81585700 | 0.00138000  |
| H | 2.74968900  | 2.69804800  | -0.00123300 |
| C | 4.67188200  | 0.76109500  | -0.00015400 |
| C | 5.00090500  | -1.61814500 | 0.00032400  |
| H | 3.21286900  | -2.82531300 | 0.00090400  |
| C | 5.53668900  | -0.33772900 | 0.00098700  |
| H | 5.07298500  | 1.76766600  | 0.00004200  |
| H | 5.65526600  | -2.48071000 | 0.00099300  |
| H | 6.60787700  | -0.18861200 | 0.00019800  |
| N | -1.85117200 | 1.08057200  | -0.00267900 |
| O | -1.62428200 | -1.18141800 | -0.00329200 |
| H | 0.90864800  | -1.92013600 | 0.00373900  |
| O | 0.21919900  | 2.55264700  | 0.00251900  |
| H | -0.77030300 | 2.23914900  | 0.00137200  |

S<sub>1</sub> geometry of 2H3NBO-keto in n-hexane solvent, b3lyp-d3/tzvp/iefpcm,  
empiricaldispersion=gd3bj

Energy= -859.870134

|   |             |             |             |
|---|-------------|-------------|-------------|
| C | -3.15745800 | 0.52490400  | -0.00448900 |
| C | -2.94284900 | -0.85882600 | 0.00686000  |
| C | -3.96331500 | -1.78022800 | 0.00603700  |
| C | -5.26643900 | -1.25798300 | -0.00937000 |
| C | -5.49565100 | 0.11826300  | -0.02119800 |
| C | -4.44867700 | 1.04360500  | -0.01863200 |
| C | -0.95884900 | 0.11815200  | 0.02456400  |
| H | -3.76710900 | -2.84306700 | 0.01607000  |
| H | -6.10688300 | -1.93920000 | -0.01139200 |
| H | -6.51489300 | 0.48286000  | -0.03250500 |
| H | -4.63045400 | 2.10927000  | -0.02716400 |
| C | 0.45578600  | 0.25886800  | 0.00871000  |
| C | 1.28625600  | -0.83188300 | 0.00385600  |
| C | 1.03237000  | 1.61899200  | 0.00569700  |
| C | 2.72232600  | -0.72159200 | 0.00273600  |

|   |             |             |             |
|---|-------------|-------------|-------------|
| C | 2.43891100  | 1.71413700  | 0.00748600  |
| C | 3.30269400  | 0.58376400  | -0.00312600 |
| C | 3.54595700  | -1.84028200 | -0.00526600 |
| H | 2.85919000  | 2.71246200  | 0.00394300  |
| C | 4.69944800  | 0.69442300  | -0.00737300 |
| C | 4.94624600  | -1.70817600 | -0.01107700 |
| H | 3.10060700  | -2.82866000 | -0.00373500 |
| C | 5.51475700  | -0.44487800 | -0.01354600 |
| H | 5.14994500  | 1.67992000  | -0.00914700 |
| H | 5.57038200  | -2.59232900 | -0.01630800 |
| H | 6.59167100  | -0.33237800 | -0.01827000 |
| N | -1.90353300 | 1.09132200  | 0.00462100  |
| O | -1.58129700 | -1.09991000 | 0.02360700  |
| H | 0.85674000  | -1.82773800 | 0.00675000  |
| O | 0.27309000  | 2.63616700  | 0.00492100  |
| H | -1.58788400 | 2.06197100  | -0.00003000 |

S<sub>2</sub> geometry of 2H3NBO-enol in n-hexane solvent, b3lyp-d3/tzvp/iefpcm,

empiricaldispersion=gd3bj

Energy= -859.839473

|   |             |             |             |
|---|-------------|-------------|-------------|
| C | 3.09505300  | 0.52572200  | 0.00007600  |
| C | 2.89533400  | -0.88921300 | -0.00020200 |
| C | 3.91878600  | -1.80503200 | -0.00034900 |
| C | 5.21548400  | -1.27353400 | -0.00033500 |
| C | 5.44656000  | 0.12094300  | -0.00008800 |
| C | 4.41074000  | 1.03642200  | 0.00011100  |
| C | 0.97021200  | 0.14931000  | 0.00019500  |
| H | 3.73291000  | -2.87005500 | -0.00049000 |
| H | 6.06213000  | -1.94763800 | -0.00046900 |
| H | 6.46944900  | 0.47572200  | -0.00005200 |
| H | 4.58546600  | 2.10345400  | 0.00032600  |
| C | -0.41321400 | 0.27656900  | -0.00073600 |
| C | -1.27108800 | -0.87502500 | -0.00125000 |
| C | -1.02334600 | 1.59744100  | -0.00038800 |
| C | -2.64970300 | -0.74831800 | -0.00012000 |
| C | -2.38577400 | 1.71709700  | 0.00076300  |
| C | -3.24022200 | 0.57714200  | 0.00050600  |
| C | -3.52651700 | -1.88587800 | -0.00032700 |
| H | -2.81575700 | 2.71054300  | 0.00104800  |
| C | -4.63686300 | 0.69096600  | 0.00124500  |
| C | -4.88831700 | -1.72777400 | 0.00033400  |
| H | -3.08562600 | -2.87604400 | -0.00085100 |
| C | -5.45337400 | -0.43396500 | 0.00108200  |



|   |             |             |             |
|---|-------------|-------------|-------------|
| H | -5.08132400 | 1.67957400  | 0.00181400  |
| H | -5.53655700 | -2.59541700 | 0.00021400  |
| H | -6.53004500 | -0.31745200 | 0.00164000  |
| N | 1.89551500  | 1.14059600  | 0.00043900  |
| O | 1.55341000  | -1.12352300 | -0.00005700 |
| H | -0.81574000 | -1.85605000 | -0.00183800 |
| O | -0.26877900 | 2.71412200  | -0.00081700 |
| H | 0.68693700  | 2.46715700  | -0.00052300 |

S<sub>2</sub> geometry of 2H3NBO-keto in n-hexane solvent, b3lyp-d3/tzvp/iefpcm,  
empiricaldispersion=gd3bj

Energy= -859.841798

|   |             |             |             |
|---|-------------|-------------|-------------|
| C | 3.17783200  | 0.53070600  | 0.00005900  |
| C | 2.90851300  | -0.83879500 | -0.00014300 |
| C | 3.89314300  | -1.79841000 | -0.00022600 |
| C | 5.21409700  | -1.32920300 | -0.00005700 |
| C | 5.49729100  | 0.03631900  | 0.00015100  |
| C | 4.48400900  | 0.99939500  | 0.00021700  |
| C | 0.94907800  | 0.20799200  | -0.00026800 |
| H | 3.65455900  | -2.85263800 | -0.00040400 |
| H | 6.02684300  | -2.04323400 | -0.00010400 |
| H | 6.52913300  | 0.36303700  | 0.00027200  |
| H | 4.70828100  | 2.05714600  | 0.00037800  |
| C | -0.45508000 | 0.32094100  | 0.00002200  |
| C | -1.27742000 | -0.80799000 | 0.00008200  |
| C | -1.10351300 | 1.62417700  | -0.00003400 |
| C | -2.68795000 | -0.72212000 | 0.00006600  |
| C | -2.45379000 | 1.73255300  | -0.00007000 |
| C | -3.29663200 | 0.56465900  | 0.00002400  |
| C | -3.51479500 | -1.87050700 | 0.00016000  |
| H | -2.90252400 | 2.71675100  | -0.00009200 |
| C | -4.69403100 | 0.65714200  | 0.00004200  |
| C | -4.88915700 | -1.75218200 | 0.00017700  |
| H | -3.04973800 | -2.84986300 | 0.00020500  |
| C | -5.48403400 | -0.48324500 | 0.00012200  |
| H | -5.15734400 | 1.63725500  | 0.00000200  |
| H | -5.50964200 | -2.64008900 | 0.00024500  |
| H | -6.56321700 | -0.39161100 | 0.00013900  |
| N | 1.94289900  | 1.15249500  | 0.00008500  |
| O | 1.54111000  | -1.02819000 | -0.00031900 |
| H | -0.80927300 | -1.78351800 | 0.00010300  |
| O | -0.27919800 | 2.67144800  | -0.00007200 |
| H | 1.77195900  | 2.14464900  | -0.00014700 |

SA3-CASSCF(12,12)/6-31G(d) optimized  $S_0$ -min geometry of 2H3NBO-enol

Energy= -854.492873162663

|   |             |             |             |
|---|-------------|-------------|-------------|
| C | -3.12138167 | 0.50236725  | 0.00000388  |
| C | -2.89661962 | -0.84907528 | -0.00000217 |
| C | -3.89993675 | -1.80584153 | -0.00009661 |
| C | -5.19979724 | -1.30992807 | 0.00006602  |
| C | -5.45679495 | 0.07424117  | -0.00005765 |
| C | -4.42427912 | 1.00455062  | 0.00011470  |
| C | -1.02802512 | 0.19815880  | -0.00002314 |
| C | 0.43693864  | 0.33237519  | 0.00002972  |
| C | 1.23004514  | -0.80694210 | -0.00005901 |
| C | 1.04840658  | 1.62133145  | -0.00001808 |
| C | 2.64469976  | -0.71989066 | -0.00014523 |
| C | 2.42507493  | 1.71955203  | 0.00004686  |
| C | 3.24754507  | 0.56439650  | -0.00011723 |
| C | 3.47193120  | -1.88126595 | 0.00021892  |
| C | 4.67029461  | 0.64902967  | 0.00004801  |
| C | 4.81839193  | -1.77171349 | -0.00012391 |
| C | 5.43567733  | -0.48909476 | -0.00008911 |
| N | -1.88410469 | 1.14111973  | 0.00003140  |
| O | -1.54913007 | -1.03596966 | -0.00005673 |
| O | 0.34188363  | 2.76764732  | 0.00001298  |
| H | -3.68455071 | -2.85715032 | -0.00008952 |
| H | -6.02559524 | -1.99755680 | -0.00007053 |
| H | -6.47606415 | 0.41509468  | 0.00024461  |
| H | -4.61246421 | 2.06142836  | 0.00007499  |
| H | 2.86491363  | 2.69943534  | -0.00009366 |
| H | 3.00325282  | -2.85012359 | -0.00032875 |
| H | 5.13542048  | 1.61879211  | -0.00017747 |
| H | 5.43490585  | -2.65286930 | 0.00052633  |
| H | 6.50837229  | -0.41809238 | 0.00018665  |
| H | 0.76375910  | -1.77344044 | -0.00006537 |
| H | -0.59525343 | 2.59324611  | 0.00003310  |

SA3-CASSCF(12,12)/6-31G(d) optimized  $S_1$ -min geometry of 2H3NBO-enol

Energy= -854.344519176868

|   |            |            |            |
|---|------------|------------|------------|
| C | -3.1187780 | 0.5027459  | 0.0266412  |
| C | -2.9042060 | -0.8543257 | -0.0357533 |
| C | -3.9111493 | -1.7993776 | -0.0832011 |
| C | -5.2122564 | -1.2990800 | -0.0647197 |
| C | -5.4597040 | 0.0823673  | -0.0013120 |
| C | -4.4201633 | 1.0065722  | 0.0452947  |

|   |            |            |            |
|---|------------|------------|------------|
| C | -1.0214258 | 0.1802149  | 0.0196757  |
| C | 0.4047480  | 0.3060199  | 0.0315271  |
| C | 1.2456025  | -0.8265704 | -0.0186630 |
| C | 1.0376636  | 1.6146816  | 0.0960959  |
| C | 2.6154792  | -0.7274056 | -0.0089098 |
| C | 2.4335173  | 1.7395718  | 0.1070550  |
| C | 3.2765535  | 0.6065407  | 0.0564615  |
| C | 3.4458251  | -1.8558058 | -0.0593158 |
| C | 4.6818747  | 0.6820180  | 0.0647073  |
| C | 4.8649650  | -1.7441459 | -0.0496740 |
| C | 5.4900849  | -0.4832317 | 0.0118978  |
| N | -1.8866707 | 1.1345778  | 0.0607644  |
| O | -1.5577932 | -1.0535671 | -0.0400716 |
| O | 0.3250006  | 2.7384230  | 0.1471812  |
| H | -3.7014566 | -2.8510191 | -0.1312862 |
| H | -6.0407873 | -1.9826845 | -0.0990911 |
| H | -6.4766599 | 0.4306742  | 0.0110880  |
| H | -4.6046004 | 2.0632118  | 0.0936764  |
| H | 2.8448157  | 2.7302593  | 0.1552453  |
| H | 2.9982861  | -2.8319118 | -0.1067046 |
| H | 5.1466961  | 1.6502055  | 0.1122619  |
| H | 5.4568271  | -2.6395148 | -0.0902309 |
| H | 6.5600095  | -0.4046088 | 0.0189171  |
| H | 0.7945209  | -1.7994860 | -0.0663023 |
| H | -0.6142759 | 2.5497419  | 0.1338792  |

SA3-CASSCF(12,12)/6-31G(d) optimized S<sub>2</sub>-min geometry of 2H3NBO-enol

Energy= -854.288286599694

|   |             |             |             |
|---|-------------|-------------|-------------|
| C | -3.13527344 | 0.52076156  | 0.00000929  |
| C | -2.91014691 | -0.83642154 | -0.00003486 |
| C | -3.90704549 | -1.79122108 | -0.00003559 |
| C | -5.21327101 | -1.30268629 | -0.00000647 |
| C | -5.47218179 | 0.07736959  | 0.00006086  |
| C | -4.44051583 | 1.01258632  | 0.00005704  |
| C | -1.03637332 | 0.21660404  | -0.00003879 |
| C | 0.39925017  | 0.34491026  | -0.00005813 |
| C | 1.24658068  | -0.83873937 | -0.00008853 |
| C | 0.99681480  | 1.59108446  | -0.00003051 |
| C | 2.68065070  | -0.72917652 | -0.00004258 |
| C | 2.42546354  | 1.73599051  | -0.00003736 |
| C | 3.26099974  | 0.60523505  | -0.00002341 |
| C | 3.50103453  | -1.86780231 | 0.00000380  |
| C | 4.66107407  | 0.65087770  | -0.00002861 |
| C | 4.89905660  | -1.78948930 | 0.00010130  |

|   |             |             |             |
|---|-------------|-------------|-------------|
| C | 5.45728852  | -0.53873651 | 0.00002379  |
| N | -1.90695800 | 1.16344901  | 0.00000407  |
| O | -1.56035045 | -1.02153441 | -0.00006635 |
| O | 0.32201491  | 2.73286756  | 0.00001179  |
| H | -3.68786490 | -2.84210048 | -0.00008418 |
| H | -6.03559887 | -1.99460850 | 0.00006738  |
| H | -6.49213120 | 0.41724186  | 0.00007641  |
| H | -4.63506333 | 2.06855028  | 0.00008673  |
| H | 2.82956623  | 2.72875357  | -0.00000690 |
| H | 3.02368735  | -2.83208041 | 0.00008077  |
| H | 5.16219290  | 1.60147490  | -0.00004154 |
| H | 5.50199149  | -2.67649473 | 0.00000930  |
| H | 6.52683238  | -0.42610715 | 0.00013772  |
| H | 0.78879437  | -1.80734809 | -0.00010085 |
| H | -0.62300246 | 2.57060202  | 0.00001843  |

SA3-CASSCF(12,12)/6-31G(d) optimized MECI geometry of 2H3NBO-enol

Energy= -854.279363957932

|   |            |            |            |
|---|------------|------------|------------|
| C | -3.1408883 | 0.4901637  | 0.1189805  |
| C | -2.9290499 | -0.8366538 | -0.1490209 |
| C | -3.9417906 | -1.7699755 | -0.3129152 |
| C | -5.2364330 | -1.2774025 | -0.1871089 |
| C | -5.4802528 | 0.0817139  | 0.0882826  |
| C | -4.4394326 | 0.9886405  | 0.2460639  |
| C | -1.0513691 | 0.1810054  | 0.0118615  |
| C | 0.4190572  | 0.3033154  | 0.0063244  |
| C | 1.2025644  | -0.8373962 | -0.1930546 |
| C | 1.0117742  | 1.5535000  | 0.1733067  |
| C | 2.6829032  | -0.7054155 | -0.0852055 |
| C | 2.4734739  | 1.7216906  | -0.0004123 |
| C | 3.2486417  | 0.6319986  | -0.1510167 |
| C | 3.5052146  | -1.7827174 | 0.3294304  |
| C | 4.6908924  | 0.5801896  | -0.5177478 |
| C | 4.9389984  | -1.6303880 | 0.4608308  |
| C | 5.5095108  | -0.5029040 | 0.0224342  |
| N | -1.8987137 | 1.1109519  | 0.2152467  |
| O | -1.5841214 | -1.0273062 | -0.2148499 |
| O | 0.3550079  | 2.6978419  | 0.4136761  |
| H | -3.7362121 | -2.8022351 | -0.5225220 |
| H | -6.0685436 | -1.9476507 | -0.3022512 |
| H | -6.4960870 | 0.4213235  | 0.1775812  |
| H | -4.6179926 | 2.0262596  | 0.4558134  |
| H | 2.8462514  | 2.7238099  | -0.0963526 |
| H | 3.0517890  | -2.7333979 | 0.5435206  |

|   |            |            |            |
|---|------------|------------|------------|
| H | 5.0423168  | 1.1323633  | -1.3695819 |
| H | 5.5199195  | -2.4433446 | 0.8549333  |
| H | 6.5793889  | -0.3864556 | 0.0260527  |
| H | 0.7576563  | -1.7656837 | -0.4911024 |
| H | -0.5869577 | 2.5479709  | 0.4488268  |
